# Supplementary material for: The interfacial structure and dynamics in a polymer nanocomposite containing small attractive nanoparticles: a full atomistic molecular dynamics simulation study
Source: Royal Society of Chemistry journal article supplement (doi:10.1039/d0cp00799d), 2020-01-01
Supplement: d0cp00799d1.pdf [file d0cp00799d1.pdf]

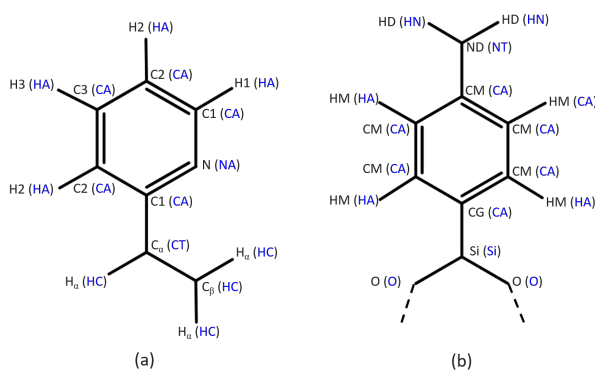

**Figure 1** The structural formula of (a) 2-vinylpyridine unit and (b) octaaminophenyl polyhedraloligomeric silsesquioxane particle. Atomic types or labels given in black/blue are for nonbonded/bonded interaction parameters listed in the following tables. In OAPS particle, only one Si and two O atoms are shown for clarity.

**Table 1** Nonbonded force-field parameters for poly(2-vinylpyridine) and octaaminophenyl polyhedraloligomeric silsesquioxane.

$$V(r_{ij}) = 4\epsilon \left[ \left( \frac{\sigma}{r_{ij}} \right)^{12} - \left( \frac{\sigma}{r_{ij}} \right)^6 \right] + (q_i q_j / 4\pi\epsilon_0 r_{ij}) \left[ r_{ij}^{-1} + \left( (\epsilon_{RF-1}) (2\epsilon_{RF} + 1) \right) \left( \frac{r_{ij}^2}{r_{cutoff}^2} \right) \right]$$

| atom type                                            | bond type | $\epsilon/kJmol^{-1}$ | $\sigma/nm$ | q/e     |
|------------------------------------------------------|-----------|-----------------------|-------------|---------|
| poly(2-vinylpyridine)                                |           |                       |             |         |
| NA                                                   | NC        | 0.7112                | 0.3250      | -0.6560 |
| C1                                                   | CA        | 0.2928                | 0.355       | 0.5145  |
| H1                                                   | HA        | 0.1255                | 0.242       | 0.0120  |
| C2                                                   | CA        | 0.2928                | 0.355       | -0.422  |
| H2                                                   | HA        | 0.1255                | 0.242       | 0.0835  |
| C3                                                   | CA        | 0.2928                | 0.355       | 0.2270  |
| H3                                                   | HA        | 0.1255                | 0.242       | 0.0650  |
| C $_{\alpha}$                                        | CT        | 0.2761                | 0.350       | -0.1080 |
| H $_{\alpha}$                                        | HC        | 0.1255                | 0.250       | 0.1080  |
| C $_{\beta}$                                         | CT        | 0.2761                | 0.350       | -0.1200 |
| H $_{\beta}$                                         | HC        | 0.1255                | 0.250       | 0.0600  |
| octaaminophenyl polyhedral oligomeric silsesquioxane |           |                       |             |         |
| Si                                                   | Si        | 2.5104                | 0.3920      | 1.020   |
| O                                                    | O         | 0.6368                | 0.3154      | 0.6368  |
| CM                                                   | CA        | 0.2940                | 0.355       | -0.115  |
| CG                                                   | CA        | 0.2940                | 0.355       | 0.000   |
| HM                                                   | HA        | 0.1260                | 0.242       | 0.115   |
| CN                                                   | CA        | 0.2928                | 0.355       | 0.020   |
| ND                                                   | NT        | 0.7112                | 0.330       | -0.780  |
| HD                                                   | HN        | 0.000                 | 0.0000      | 0.380   |

**Table 2** Bond stretching parameters.

| harmonic bonds                                       | $r_0/\text{nm}$ | $V_{\text{bond}} = (K_r/2)(r - r_0)^2$<br>$k_r/\text{kJmol}^{-1}\text{nm}^{-2}$ |
|------------------------------------------------------|-----------------|---------------------------------------------------------------------------------|
| poly(2-vinylpyridine)                                |                 |                                                                                 |
| CA-NC                                                | 0.134           | 404174.4                                                                        |
| CA-CA                                                | 0.140           | 392459.2                                                                        |
| CA-CT                                                | 0.151           | 265265.6                                                                        |
| CA-HA                                                | 0.108           | 307105.6                                                                        |
| CT-HC                                                | 0.109           | 284512                                                                          |
| CT-CT                                                | 0.153           | 224262.4                                                                        |
| octaaminophenyl polyhedral oligomeric silsesquioxane |                 |                                                                                 |
| Si-O                                                 | 0.163           | 323984.0                                                                        |
| CA-CA                                                | 0.139           | 393022.0                                                                        |
| CA-Si                                                | 0.184           | 100000                                                                          |
| CA-NT                                                | 0.134           | 402500.8                                                                        |
| CA-HA                                                | 0.108           | 200000                                                                          |
| NT-HN                                                | 0.101           | 363171.2                                                                        |

**Table 3** Bond angle parameters.

| harmonic bond angles                                 | $\theta_0/^\circ$ | $V(\theta) = (k_\theta/2)(\theta - \theta_0)^2$<br>$k_\theta/\text{kJmol}^{-1}\text{rad}^{-2}$ |
|------------------------------------------------------|-------------------|------------------------------------------------------------------------------------------------|
| poly(2-vinylpyridine)                                |                   |                                                                                                |
| NC-CA-CA                                             | 124.0             | 585.760                                                                                        |
| NC-CA-CT                                             | 116.0             | 585.760                                                                                        |
| CA-CA-CT                                             | 120.0             | 585.760                                                                                        |
| CA-NC-CA                                             | 117.0             | 585.760                                                                                        |
| NC-CA-HA                                             | 116.0             | 292.880                                                                                        |
| CA-CA-HA                                             | 120.0             | 292.880                                                                                        |
| CA-CA-CA                                             | 120.0             | 527.184                                                                                        |
| CA-CT-HC                                             | 109.5             | 292.990                                                                                        |
| CA-CT-CT                                             | 114.0             | 527.184                                                                                        |
| CT-CT-HC                                             | 110.7             | 313.800                                                                                        |
| HC-CT-HC                                             | 107.8             | 276.144                                                                                        |
| octaaminophenyl polyhedral oligomeric silsesquioxane |                   |                                                                                                |
| O-Si-O                                               | 109.5             | 469.72                                                                                         |
| Si-O-Si                                              | 144.0             | 209.60                                                                                         |
| CA-Si-O                                              | 114.9             | 469.72                                                                                         |
| CA-CA-Si                                             | 120.0             | 418.80                                                                                         |
| CA-CA-CA                                             | 120.0             | 376.60                                                                                         |
| CA-CA-HA                                             | 120.0             | 418.80                                                                                         |
| CA-CA-CT                                             | 120.0             | 585.76                                                                                         |
| CA-NT-HN                                             | 111.0             | 292.88                                                                                         |
| HN-NT-HN                                             | 106.4             | 364.85                                                                                         |

**Table 4** Dihedral parameters.

|                                                                              | $V_{rb}(\phi_{ijkl}) = \sum_{n=0}^5 C_n(\cos(\psi))^n$ |         |         |                                                     |        |     |
|------------------------------------------------------------------------------|--------------------------------------------------------|---------|---------|-----------------------------------------------------|--------|-----|
| Ryckaert-Bellemans dihedral angles                                           | C0                                                     | C1      | C2      | C3                                                  | C4     | C5  |
| poly(2-vinylpyridine)                                                        |                                                        |         |         |                                                     |        |     |
| A <sub>ring</sub> -A <sub>ring</sub> -A <sub>ring</sub> -A <sub>ring</sub> * | 30.334                                                 | 0.0     | -30.334 | 0.0                                                 | 0.0    | 0.0 |
| A <sub>ring</sub> -A <sub>ring</sub> -A <sub>ring</sub> -HA                  | 30.334                                                 | 0.0     | -30.334 | 0.0                                                 | 0.0    | 0.0 |
| CA-CT-CT-HC                                                                  | 0.9665                                                 | 2.8995  | 0.0     | -3.8660                                             | 0.0    | 0.0 |
| CA-CT-CT-CT                                                                  | 2.9288                                                 | -1.4644 | 0.2092  | -1.6736                                             | 0.0    | 0.0 |
| *A <sub>ring</sub> includes CA NC bond type                                  |                                                        |         |         |                                                     |        |     |
| octaaminophenyl polyhedral oligomeric silsesquioxane                         |                                                        |         |         |                                                     |        |     |
| CA-CA-NT-HN                                                                  | 16.987                                                 | 0.0     | -16.987 | 0.0                                                 | 0.0    | 0.0 |
|                                                                              |                                                        |         |         | $V(\varphi) = (k_\varphi/2)(\varphi - \varphi_0)^2$ |        |     |
| harmonic dihedral angles                                                     | $\varphi_0$ / degrees                                  |         |         | $k_\varphi$ /kJmol <sup>-1</sup> rad <sup>-2</sup>  |        |     |
| poly(2-vinylpyridine)                                                        |                                                        |         |         |                                                     |        |     |
| HA-CA-CA-CA                                                                  |                                                        | 180.0   |         |                                                     | 10.460 |     |
| HA-CA-CA-NC                                                                  |                                                        | 180.0   |         |                                                     | 10.460 |     |
| NC-CA-CT-CA                                                                  |                                                        | 180.0   |         |                                                     | 10.460 |     |
| octaaminophenyl polyhedral oligomeric silsesquioxane                         |                                                        |         |         |                                                     |        |     |
| CA-CA-CA-HA                                                                  |                                                        | 180.0   |         |                                                     | 10.460 |     |
| CA-CA-CA-CA                                                                  |                                                        | 180.0   |         |                                                     | 10.460 |     |
| CA-CA-CA-Si                                                                  |                                                        | 180.0   |         |                                                     | 10.460 |     |
| CA-CA-CA-NT                                                                  |                                                        | 180.0   |         |                                                     | 10.460 |     |
